# Supplementary material for: Impact of aortic valve replacement in symptomatic low-risk patients with less than severe aortic stenosis
Source: PubMed Central journal article supplement — Open Heart. 2023 May 12;10(1):e002297. doi: 10.1136/openhrt-2023-002297 (PMC10186477; doi:10.1136/openhrt-2023-002297), 2023-05-12
Supplement: openhrt-2023-002297supp001.pdf [file openhrt-2023-002297supp001.pdf]

**SUPPLEMENTAL MATERIAL****Supplemental Table 1.** Key Inclusion Criteria for Severe AS from the Evolut Low Risk Trial

---

|                                                                                                                                                                                                                                                                                                                                                                                                                                                                                                                                                                                                                                                                                                                                                                                                                                                                                                                                                                                                                                                                                                                                                                                                                 |
|-----------------------------------------------------------------------------------------------------------------------------------------------------------------------------------------------------------------------------------------------------------------------------------------------------------------------------------------------------------------------------------------------------------------------------------------------------------------------------------------------------------------------------------------------------------------------------------------------------------------------------------------------------------------------------------------------------------------------------------------------------------------------------------------------------------------------------------------------------------------------------------------------------------------------------------------------------------------------------------------------------------------------------------------------------------------------------------------------------------------------------------------------------------------------------------------------------------------|
| <b>Symptomatic Severe AS</b>                                                                                                                                                                                                                                                                                                                                                                                                                                                                                                                                                                                                                                                                                                                                                                                                                                                                                                                                                                                                                                                                                                                                                                                    |
| <ul style="list-style-type: none"><li>▪ Aortic valve area <math>\leq 1.0 \text{ cm}^2</math> (or aortic valve area index of <math>\leq 0.6 \text{ cm}^2/\text{m}^2</math>), OR mean gradient <math>\geq 40 \text{ mmHg}</math>, OR aortic valve velocity <math>\geq 4.0 \text{ m/s}</math> by transthoracic echocardiography at rest</li></ul>                                                                                                                                                                                                                                                                                                                                                                                                                                                                                                                                                                                                                                                                                                                                                                                                                                                                  |
| <b>Asymptomatic Severe AS</b>                                                                                                                                                                                                                                                                                                                                                                                                                                                                                                                                                                                                                                                                                                                                                                                                                                                                                                                                                                                                                                                                                                                                                                                   |
| <ul style="list-style-type: none"><li>▪ Very severe aortic stenosis with an aortic valve area of <math>\leq 1.0 \text{ cm}^2</math> (or aortic valve area index of <math>\leq 0.6 \text{ cm}^2/\text{m}^2</math>), AND peak aortic velocity <math>\geq 5.0 \text{ m/s}</math> or mean gradient <math>\geq 60 \text{ mmHg}</math> by transthoracic echocardiography at rest, OR</li><li>▪ Aortic valve area of <math>\leq 1.0 \text{ cm}^2</math> (or aortic valve area index of <math>\leq 0.6 \text{ cm}^2/\text{m}^2</math>), AND a mean gradient <math>\geq 40 \text{ mmHg}</math> or aortic valve velocity <math>\geq 4.0 \text{ m/s}</math> by transthoracic echocardiography at rest, AND an exercise tolerance test that demonstrates a limited exercise capacity, abnormal blood pressure response or arrhythmia, OR</li><li>▪ Aortic valve area <math>\leq 1.0 \text{ cm}^2</math> (or aortic valve area index of <math>\leq 0.6 \text{ cm}^2/\text{m}^2</math>), AND mean gradient <math>\geq 40 \text{ mmHg}</math>, or aortic valve velocity <math>\geq 4.0 \text{ m/s}</math> by transthoracic echocardiography at rest, AND a left ventricular ejection fraction <math>&lt; 50\%</math></li></ul> |

---

**Supplemental Table 2.** Echocardiography Parameters at Discharge for Patients with Moderately-Severe AS and Severe AS

|                                                          | Moderately-Severe AS (n=113) |                  |         | Severe AS (n=1300)   |                   |         |
|----------------------------------------------------------|------------------------------|------------------|---------|----------------------|-------------------|---------|
|                                                          | TAVR<br>(n=66)               | SAVR<br>(n=47)   | p Value | TAVR<br>(n=661)      | SAVR<br>(n=639)   | p Value |
| Aortic valve area, cm <sup>2</sup>                       | 2.4 ± 0.6 [55]               | 2.0 ± 0.6 [25]   | 0.004   | 2.2 ± 0.6 [522]      | 2.1 ± 0.7 [381]   | 0.03    |
| Aortic valve area index, cm <sup>2</sup> /m <sup>2</sup> | 1.18 ± 0.27<br>[55]          | 0.99 ± 0.28 [25] | 0.006   | 1.09 ± 0.28<br>[522] | 1.04 ± 0.32 [379] | 0.05    |
| Peak velocity, m/s                                       | 1.9 ± 0.5 [64]               | 2.3 ± 0.6 [44]   | <0.001  | 2.1 ± 0.4 [641]      | 2.3 ± 0.5 [590]   | <0.001  |
| Mean pressure gradient, mm Hg                            | 8.3 ± 3.9 [64]               | 12.0 ± 5.9 [44]  | <0.001  | 9.8 ± 3.9 [640]      | 12.3 ± 5.1 [588]  | <0.001  |
| Dimensionless velocity index                             | 0.63 ± 0.13<br>[57]          | 0.51 ± 0.12 [40] | <0.001  | 0.59 ± 0.13<br>[587] | 0.52 ± 0.12 [526] | <0.001  |
| Left ventricular ejection fraction, %                    | 65.3 ± 9.6                   | 64.3 ± 10.0 [43] | 0.60    | 66.6 ± 6.9 [657]     | 64.7 ± 7.8 [580]  | <0.001  |
| Stroke volume, ml                                        | 81.2 ± 21.3<br>[55]          | 71.8 ± 21.0 [25] | 0.07    | 78.9 ± 20.6<br>[528] | 76.9 ± 22.0 [383] | 0.16    |
| Stroke volume index, ml/m <sup>2</sup>                   | 39.4 ± 9.6<br>[55]           | 35.4 ± 9.6 [25]  | 0.09    | 39.7 ± 9.3 [528]     | 39.0 ± 11.0 [381] | 0.29    |
| Lateral E/e' ratio                                       | 15.0 ± 6.8<br>[46]           | 13.6 ± 5.5 [27]  | 0.37    | 15.9 ± 6.6 [441]     | 16.2 ± 6.3 [423]  | 0.54    |
| Total aortic regurgitation (%)                           |                              |                  | <0.001  |                      |                   | <0.001  |
| None                                                     | 20 (30.8)                    | 34 (81.0)        |         | 173 (27.1)           | 410 (74.3)        |         |
| Trace                                                    | 32 (49.2)                    | 6 (14.3)         |         | 275 (43.1)           | 123 (22.3)        |         |
| Mild/Mild to Moderate                                    | 13 (20.0)                    | 2 (4.8)          |         | 180 (28.2)           | 18 (3.3)          |         |
| Moderate/Moderate to Severe                              | 0 (0.0)                      | 0 (0.0)          |         | 8 (1.3)              | 1 (0.2)           |         |
| Severe                                                   | 0 (0.0)                      | 0 (0.0)          |         | 2 (0.3)              | 0 (0.0)           |         |

Data shown as mean ± standard deviation, mean ± standard deviation [no. of patients], or no. of patients (%).

**Supplemental Table 3.** Clinical Outcomes at 30 Days for Patients with Moderately-Severe AS and Severe AS

|                                         | Moderately-Severe AS (n=113) |             |         | Severe AS (n=1301) |              |         |
|-----------------------------------------|------------------------------|-------------|---------|--------------------|--------------|---------|
|                                         | TAVR (n=66)                  | SAVR (n=47) | p Value | TAVR (n=664)       | SAVR (n=637) | p Value |
| All-Cause Mortality or Disabling Stroke | 2 (3.0)                      | 2 (4.3)     | 0.75    | 3 (0.5)            | 15 (2.4)     | 0.003   |
| All-Cause Mortality                     | 1 (1.5)                      | 1 (2.1)     | 0.81    | 2 (0.3)            | 7 (1.1)      | 0.08    |
| Reintervention                          | 1 (1.5)                      | 0 (0.0)     | 0.40    | 1 (0.2)            | 2 (0.3)      | 0.53    |
| All Stroke and TIA                      | 4 (6.1)                      | 1 (2.1)     | 0.31    | 25 (3.8)           | 27 (4.3)     | 0.68    |
| Bleed                                   | 3 (4.5)                      | 3 (6.4)     | 0.67    | 45 (6.8)           | 68 (10.7)    | 0.01    |
| Life Threatening or Disabling           | 1 (1.5)                      | 2 (4.3)     | 0.37    | 17 (2.6)           | 49 (7.7)     | <0.001  |
| Major Bleed                             | 2 (3.0)                      | 1 (2.1)     | 0.77    | 28 (4.2)           | 20 (3.2)     | 0.30    |
| Major Vascular Complication             | 2 (3.0)                      | 1 (2.1)     | 0.77    | 25 (3.8)           | 20 (3.2)     | 0.54    |
| Acute Kidney Injury                     | 2 (3.0)                      | 5 (10.6)    | 0.10    | 13 (2.0)           | 64 (10.1)    | <0.001  |
| Myocardial Infarction                   | 0 (0.0)                      | 2 (4.3)     | 0.09    | 6 (0.9)            | 7 (1.1)      | 0.72    |
| Valve Endocarditis                      | 0 (0.0)                      | 0 (0.0)     | NA      | 0 (0.0)            | 1 (0.2)      | 0.30    |
| Valve Thrombosis                        | 1 (1.5)                      | 0 (0)       | 0.40    | 0 (0.0)            | 0 (0)        | NA      |
| Valve Thrombosis (subclinical)          | 0 (0.0)                      | 0 (0.0)     | NA      | 1 (0.2)            | 0 (0.0)      | 0.33    |
| Permanent Pacemaker Implant *           | 13 (19.7)                    | 1 (2.1)     | 0.006   | 112 (16.9)         | 40 (6.3)     | <0.001  |
| Permanent Pacemaker Implant †           | 13 (20.0)                    | 1 (2.3)     | 0.008   | 112 (17.5)         | 40 (6.5)     | <0.001  |
| Atrial Fibrillation                     | 3 (4.5)                      | 12 (25.5)   | 0.001   | 52 (7.8)           | 230 (36.2)   | <0.001  |
| Coronary Artery Obstruction             | 1 (1.5)                      | 0 (0.0)     | 0.40    | 5 (0.8)            | 2 (0.3)      | 0.28    |
| Composite Event §                       | 5 (7.6)                      | 3 (6.4)     | 0.81    | 34 (5.1)           | 71 (11.2)    | <0.001  |

Data shown as no. of patients with an event (%), where Kaplan-Meier estimates are provided as percentages. The corresponding p values were calculated by the log-rank test for all data through 30-days. \* Subjects with pacemaker or implantable cardioverter

defibrillator (ICD) at baseline are included. † Subjects with pacemaker or ICD at baseline are excluded. § Composite event includes all-cause mortality, disabling stroke, life threatening or disabling bleeding, major vascular complication, acute kidney injury stage 2 or 3. TIA= transient ischemic attack

**Supplemental Table 4.** Univariate Cox Proportional Hazards Model for All-Cause Mortality at 24-Months for Pooled Moderately-Severe AS and Severe AS Patients

|                                                                          | Hazard Ratio (95% CI) | p Value |
|--------------------------------------------------------------------------|-----------------------|---------|
| <b>Baseline Clinical Characteristics</b>                                 |                       |         |
| Moderately-Severe vs Severe AS                                           | 1.20 (0.48, 3.02)     | 0.69    |
| TAVR vs SAVR                                                             | 0.78 (0.46, 1.33)     | 0.37    |
| Age, years                                                               | 0.99 (0.95, 1.04)     | 0.82    |
| Female, %                                                                | 0.77 (0.43, 1.38)     | 0.38    |
| STS-PROM, %                                                              | 1.36 (0.93, 2.01)     | 0.12    |
| COPD                                                                     | 1.16 (0.58, 2.3)      | 0.67    |
| Hypertension                                                             | 1.94 (0.77, 4.87)     | 0.16    |
| Peripheral Arterial Disease                                              | 0.71 (0.22, 2.27)     | 0.56    |
| Cerebrovascular Disease                                                  | 1.01 (0.43, 2.35)     | 0.99    |
| NYHA Class III/IV                                                        | 1.28 (0.72, 2.28)     | 0.40    |
| Diabetes Mellitus                                                        | 1.21 (0.69, 2.12)     | 0.50    |
| Previous Myocardial Infarction                                           | 2.07 (0.88, 4.83)     | 0.09    |
| Previous CABG                                                            | 1.68 (0.41, 6.89)     | 0.47    |
| Previous PCI                                                             | 1.27 (0.62, 2.60)     | 0.51    |
| Pre-Existing Permanent Pacemaker Implant                                 | 1.64 (0.51, 5.26)     | 0.40    |
| Atrial Fibrillation/ Atrial Flutter                                      | 1.56 (0.80, 3.04)     | 0.19    |
| SYNTAX Score I                                                           | 1.04 (0.98, 1.11)     | 0.17    |
| Vascular Disease (Peripheral Arterial Disease + Cerebrovascular Disease) | 0.97 (0.48, 1.99)     | 0.94    |
| CAD (CABG + PCI + Myocardial Infarction)                                 | 1.42 (0.75, 2.70)     | 0.28    |
| Aortic Valve Calcium Volume, mm <sup>3</sup>                             | 1.00 (0.99, 1.00)     | 0.98    |

| <b>Baseline Echocardiography</b>                                                                             |                   |      |
|--------------------------------------------------------------------------------------------------------------|-------------------|------|
| Left ventricular ejection fraction, %<br>(continuous)                                                        | 0.98 (0.95, 1.00) | 0.10 |
| Left ventricular ejection fraction <50%<br>(vs ≥50%)                                                         | 1.81 (0.65, 5.01) | 0.25 |
| Aortic valve area index ≤ 0.6 cm <sup>2</sup> /m <sup>2</sup><br>(vs > 0.6 cm <sup>2</sup> /m <sup>2</sup> ) | 0.66 (0.23, 1.83) | 0.42 |
| Stroke volume, ml                                                                                            | 1.01 (0.99, 1.02) | 0.23 |
| Lateral E/e' ratio                                                                                           | 1.04 (0.99, 1.08) | 0.06 |
| Mitral regurgitation ≥ Moderate                                                                              | 1.90 (0.46, 7.78) | 0.38 |
| Aortic regurgitation ≥ Moderate                                                                              | 0.46 (0.06, 3.33) | 0.44 |

AS=aortic stenosis, CABG=coronary artery bypass grafting, COPD=chronic obstructive pulmonary disease, MI=myocardial infarction, PCI=percutaneous coronary intervention, SAVR=surgical aortic valve replacement, STS-PROM= The Society of Thoracic Surgeons Predicted Risk of Mortality, TAVR=transcatheter aortic valve replacement
